# Supplementary material for: Melatonin Improves Drought Stress Tolerance of Tomato by Modulating Plant Growth, Root Architecture, Photosynthesis, and Antioxidant Defense System
Source: MDPI journal article supplement (doi:10.3390/antiox11020309), 2022-02-03
Supplement: s1 [file s1]

**Table S1.** The detail of primers.

| Gene acronym | Accession number | Forward primer       | Reverse primer       |
|--------------|------------------|----------------------|----------------------|
| <i>actin</i> | Solyc03g078400   | TGGTCGGAATGGGACAGAAG | CTCAGTCAGGAGAACAGGGT |
| <i>SOD</i>   | Solyc02g082590   | ACTACTCCCAGTTGCATCCC | CACCAGGAGCAGCCATGATA |
| <i>CAT</i>   | Solyc12g094620   | GCAGCTCCCAGTTAATGCTC | AGCAGGACGACAAGGATCAA |
| <i>APX</i>   | Solyc06g005150   | GGCACTCTGCTGGTACCTAT | GGAGAGAGTGGGAAACTGCT |
| <i>GR</i>    | Solyc09g065900   | GGAGCCATAGAGGTTGACGA | CTCCTCCCTCCATCAAAGCA |
| <i>MDHAR</i> | Solyc08g081530   | CGGACAGTTCCGAACAAACA | CCCGTGCAATTCGGTTGTAT |
| <i>DHAR</i>  | Solyc05g054760   | GAGGTGAACCCTGAAGGGAA | CCCACAGAGGCAAATTCAGG |
| <i>GST</i>   | Solyc05g006740   | TTGTCTGGTGCTCTCTTCGT | TGAGAGCAACTGGAGCATGA |
| <i>POD</i>   | Solyc07g052510   | GGTCTGTTCCAATCCGATGC | CACCAGCACTCCCTGTCTTA |
